## **Factors influencing participation in sports, exercise, and physical activity in adolescents with idiopathic scoliosis: a protocol for a qualitative secondary data analysis**

**S.Tucker, A.Soundy, S.Alamrani, A.Gardner, A.Rushton, D.Falla, N.R.Heneghan**

### **Abstract**

**Introduction:** Adolescent idiopathic scoliosis (AIS) is one of the most common paediatric spinal complaints (2-3% of children < 16 years). Regular physical activity is recommended and has been associated with significant improvements in quality of life, reduced pain, and improved function in AIS. However, participation rates remain low amongst individuals with AIS with limited research examining why. This qualitative study aims to identify factors influencing participation in sports, exercise, and physical activities in AIS.

**Methods and analysis:** A qualitative interpretive hermeneutic phenomenology study will be conducted. This study will use a subtle-realist view to enable a focus on the most common experiences of individuals with AIS considering factors influencing participation in exercise, sports, and physical activity. This will be a secondary data analysis (SDA) of a single centre qualitative study completed at a tertiary scoliosis centre during 2022. Participant data drawn from semi structured interviews of individuals <18 years old with a diagnosis of AIS will be included in a six-phase thematic analysis. Rigor will be enhanced through a qualitative checklist, reflexivity, researchers with expertise in the phenomena of interest, and additional researchers from the parent study to critique. Patient and public involvement has been utilised since conceptualisation to improve transparency of reporting.

**Ethics and dissemination:** Full ethical approval was given for this SDA and the parent study

by the Health Research Authority (IRAS 289888) and Health and Care Research Wales

**NOTE:** This preprint reports new research that has not been certified by peer review and should not be used to guide clinical practice.

approval (REC reference: 21/WM/0076). Dissemination will be via peer reviewed publication and conference presentation with results being used to inform future research projects.

**Registration details:** No prior registration has been used for this protocol due to the empirical nature of this secondary data analysis.

### **Strengths and Limitations:**

- This project will be conducted with a multidisciplinary research team with expertise in qualitative research, spinal conditions and AIS, and patient and public involvement.
- This study has ethical strengths in its efficiency of data capture from a single parent study. This is significantly cheaper with standardised procedures, less requirement on children suffering from AIS, and relieves the burden of further participant recruitment.
- The nature of SDA requires researcher reflexivity and involvement of the primary researcher from parent study to ensure that there is no loss of contextual information or a lack of immersion in the data.
- The sample will be limited to a single centre study with sampling limited to specialist scoliosis clinics giving opportunity for inferential generalisation, but lacking opportunity for broad basis generalisations or subgroup analysis.
- The primary aim of parent study was to assess the content validity of the SRS-22r rather than assessment of factors influencing exercise. However, the interview topic guide was reviewed by the secondary data analyst as well as the wider research team to ensure the capture of appropriate and relevant data for this study.

## **Introduction**

AIS is one of the most common paediatric spinal conditions present in approximately 2-3% of those under age 16 years (1). According to the Scoliosis Research Society, idiopathic scoliosis is a lateral curvature of the spine  $> 10$  degrees Cobb angle combined with rotation and unknown aetiology (2). Of those with AIS some will develop spinal pain, although the exact relationship remains unclear and does not appear to be linked with biomechanics or extent of the Cobb angle (3). Approximately 1 in 5 children with spinal pain experience increasing pain from the age of 6 to 17 years which has a clear association with societal costs (4). Furthermore, children who suffer from prolonged spinal pain are more at risk of developing chronic pain into adulthood (4). AIS presents several key issues including physical deformity, reduced quality of life, and issues surrounding self-perception and self-image (5).

Several management strategies for AIS have been well researched and implemented. Surgery for AIS has been shown to improve both self-image and satisfaction with treatment (6). Furthermore, patients with unoperated scoliosis have reported issues with body image, self-perception and back pain at a 50-year follow-up (7). The literature also suggests that in AIS negative self-perception of body image has a strong correlation with back pain due to the psychological distress (3). Another well researched AIS management strategy is exercise. Although sports, exercise, and physical activity are often used interchangeably they each describe different concepts (8). Sport is described as ‘an organised subset of exercises with a defined goal, it can be spontaneous or organised by specific categories, including but not limited to; age, gender, weight, goal’, etc (9, 10). Although exercise shares several

components with physical activity it is not synonymous due to its planned, structured, and repetitive nature (8). Physical activity is a term adopted globally to describe any bodily movement that results in energy expenditure and can include leisure, exercise, or household tasks (8, 11). The International Classification of Functioning, Disability and Health: Children and Youth version (ICF-CY) incorporate a wide range of physical activities into the classification of mobility ranging from basic movements such as changing from lying to sitting to more complex activities such as jumping and swimming (12). Sports, exercise, and physical activity each have a requirement on physical function in order to participate. However, there remains a substantial lack of research regarding factors influencing participation in either sports, exercise, or physical activity in AIS. Therefore, all three components have been searched and explored to determine a meaningful conclusion regarding participation within AIS.

Current UK government exercise guidelines state that children and adolescents over the age of 5 years should participate in 60 minutes of physical activity per day (13), compared with 20 minutes of physical activity per day for those with disabilities (14). There are many benefits to active participation in sports, exercise and physical activity for adolescents with spinal pain (15, 16). Specifically within AIS these benefits include improved quality of life (5, 17). However, the benefits of exercise on Cobb angle continues to be debated (5, 17). Therefore, due to the known benefits of exercise in AIS it is timely to evaluate treatments such as exercise and factors influencing participation (18).

It has been shown that radiographic changes poorly correlate with health-related quality of life (HRQOL) in adults, but treatments such as exercise, that aim to improve pain and promote function are best placed to improve HRQOL (19). Cochrane review evidence

identifies no risks associated with participating in exercise in AIS (20). There is some evidence to suggest no difference in restrictions towards sporting activity following spinal fusion compared to nonoperative treatment (21). Whilst the majority of routine practice encourages exercise following spinal surgery for AIS, individuals are usually advised to avoid contact sports post-operatively (22-24). Individuals with AIS who regularly participate in physical activity have improved HRQOL, physical and mental wellbeing, and self-esteem (6, 17, 25, 26). Moreover, adolescent sports participation promotes friendship development and cooperation with others (27). The literature consistently concludes that individuals with scoliosis who regularly participate in exercise have enhancements in HRQOL (28, 29).

Despite the known benefits of exercise for AIS, there remains an association between AIS, back pain, and discontent with body image (30). Furthermore, those with AIS report that their condition limits their participation in sports, exercise and physical activities due to functional impairment and back pain, reducing HRQOL (21, 27). The factors influencing sports participation in AIS patients remains unreported (27). To the best of the authors knowledge only two studies exist within AIS looking at factors influencing physical functioning rather than sports, exercise, and physical activity. One study focused on aspects of physical functioning such as cardiovascular function and immunological function (31). Results identified impaired body structure as a barrier to participation, whilst external support from others acted as a facilitator but did not represent participant voices or experiences (31). A second study identified pre-surgical experiences of individuals with AIS and identified psychosocial support as a key component in living with their scoliosis (32). Due to the lack of understanding regarding factors influencing participation in sports, exercise, and physical activity in AIS this study aims to examine the interview transcripts as part of a secondary data

analysis (SDA) for qualitative factors influencing participation and relevant trends across discrete subpopulations.

### **Study objectives**

1. To identify individual factors influencing participation in sports, exercise and physical activity for participants with AIS.
2. To determine if there are any trends in participation across discrete sub-populations of AIS, such as curve severity, curve morphology or management strategy.

## **Methods and analysis**

### **Research Design**

This protocol has been guided and reported according to the Standards for Reporting Qualitative Research (SRQR) guidelines and the Consolidated criteria for Reporting Qualitative research Checklist (COREQ) (33, 34). This study will be a thematic SDA of qualitative data obtained by another member of the research team (SA) as part of a parent study examining the content validity of the SRS-22r (35).

This SDA provides an objective perspective on factors influencing sports, exercise, and physical activity participation in AIS, due to the reduced emotional connection to the data (36). The potential drawbacks of SDA have been mitigated by including members of the parent study research team in the SDA (37). This included the lead researcher for the primary collection (SA), the guarantor of the data (NH), and those advising from a clinical and academic perspective (AG, AR, DF), in addition to new members of the team with expertise in qualitative data analysis (AS), and physiotherapeutic practice (ST).

### **Qualitative approach and research paradigm**

A subtle-realist world view will be used to help identify a pertinent reality from different qualitative perspectives against a quality criteria (38, 39). Subtle-realism reflects the nature of the research rather than the beliefs of the healthcare researcher (38, 39). Although some argue that subtle-realism has no true ontological basis and lacking certainty (39). Subtle-realism is increasingly embraced as valuable in healthcare research due to its involvement of subjective

perceptions whilst not precluding independent phenomena of objects, relationships and experiences (39-41).

Interpretive hermeneutic phenomenology understands that individual experiences are unique, rich and complex (42). Furthermore, using a quality criteria involving validity and relevance the methodology allows the researcher to use qualitative data to denote a pertinent reality (43). The hermeneutic cycle allows an interplay of interpretation and tradition beyond subjective vagueness or objective interpretation towards an understanding of the context of individual experience (42).

### **Researcher characteristics and reflexivity**

The primary data collector (SA) is a physiotherapist who has developed a reflexive relationship with the data along with the physiotherapists, academics, and surgeons involved in the project, and their perspective influence on data interpretation (43). By recognising and acknowledging foreknowledge from clinical experience, both the primary and secondary data analysts (SA, ST) are able to relinquish attachments to their current knowledge to develop reflexivity (42, 44). Distance between the lead secondary data analyst (ST) and the participants was maintained due to the nature of a SDA, further improving reflexivity (43). Both researchers are female physiotherapists completing doctorate studies, with a special interest in scoliosis and exercise. Participants had no knowledge of the researcher prior to the interview to help further reduce bias (45). Furthermore, advanced preparation of both the primary and secondary data analyst allows in depth interviewing due to a comprehensive understanding of the context of a respondent's community, generation, work, and personal family life (37). Furthermore, the SDA will be completed closely following primary data



collection helping to ensure accurate interpretation due to the risk of interpreting ability waning over time (37, 46).

### **Patient and public involvement (PPI)**

PPI has been involved from the conceptualisation stage and will continue to be until dissemination. This study has involved those who are not participants in research decisions including clinicians in the field and academics regarding research methodology. There has been a PPI representative (ER) involved in giving feedback throughout the parent study on the study protocol, participant information sheet, interview topic guide, consent form, and has reviewed original study results. The guidance for reporting involvement of patients and the public (GRIPP2) checklist will be used to further promote quality, transparency, and consistency of PPI reporting in this study, Supplementary File 1 (47).

### **Context**

The primary data collection took place through interviews virtually over Zoom from January to April 2022. This was done in accordance with national guidance on COVID-19 precautions at the time of study conception (48, 49). Prior to primary data collection, interview questionnaires were co-designed and co-constructed with clinicians working in the field, academics, and the secondary data analyst to ensure relevance of the work being completed (50). One pilot interview was conducted with an individual who has scoliosis age 21; this allowed the primary researcher to balance both researcher relationship and rigor, reformulate and refine questions, and ensure focus as required in healthcare (51-54). No substantial changes to the topic guide were made to the topic guide, Supplementary File 2.

## **Sampling strategy**

All participants were recruited using purposive sampling from a single tertiary scoliosis centre in the UK during the parent study by a specialist surgeon and member of the research team (AG). Purposive sampling achieved theoretical representativeness whereby the sampling and generalisability of the parent study is translated to the SDA due to similarities in time, place, and participants (55). Although qualitative data is not empirically generalisable, purposive sampling ensures results are theoretically generalisable, a complex process to understand concepts, phenomena, and propositions relevant to other similar settings and individuals (44, 56, 57). To reduce selection bias recruitment occurred independently of the primary researcher or secondary data analyst prior to the interview (45). The sample size (n=11) was deemed sufficiently large and varied for analysis with size being determined by participant contribution (58). Furthermore, sample size was determined by data saturation, which was achieved by interview seven, remaining interviews identified that no further interviews were required. Data saturation was determined during the parent study using a saturation table (35). During the parent study naturalistic generalisation was achieved, this understands that results remain generalisable whilst maintaining individual subjective meaning (59).

## **Eligibility Criteria**

The population of interest for this study was adolescents with AIS aged 11-18 years. All individuals have scoliosis with a Cobb angle greater than 10 degrees and no maximum curve

size has been applied as an exclusion criteria to participants (60). No other exclusion criteria were applied with regards to gender, language, ethnicity, or socioeconomic status.

### **Ethical issues pertaining to human subjects**

One of the chief concerns with SDA are the confidentiality agreements. However, ethical approval was gained to ensure the SDA does not exploit participants original consent (36, 37, 61). Analysed data will be anonymised prior to the SDA conforming to legal and ethical guidelines regarding protection of participant identity without losing the value in qualitative information (37).

### **Data collection**

Demographic data was recorded for each participant including age, gender, ethnicity, curve location and severity, pain intensity, SRS-22r scores, management of AIS, and physical activity levels. The Lenke classification was used to describe participants spinal curvature, allowing comparative analysis between participants and treatments (62).

Data were collected using semi-structured interviews with the first researcher over Zoom. Interviews consisted of two parts; firstly ethics statement, background of the SRS-22r, introductory questions, transition questions, and concept elicitation. The second part of the interview consists of cognitive debriefing of the SRS-22r, followed by a conclusion. See Supplementary File 2 for the topic guide. The first section includes questions such as ‘Do you like exercising?’ and prompt questions such as ‘What is it that you like / dislike about exercising?’. This was done within the parent study to identify key concepts regarding the

influence of AIS on quality of life (35). The second part of the interview was a cognitive debriefing to assess the content validity of the SRS-22r (35). The second part included questions such as ‘what is your current level of activity?’ providing valuable information for the purposes of our secondary data analysis exploring factors influencing sports, exercise, and physical activity participation in AIS (35).

Interviews were standardised with the first researcher and all eligible participants enrolled. Participants were allowed to choose to complete the interview with a parent, caregiver or guardian. Following interview completion the first researcher (SA) completed analysis for the parent study and the second researcher (ST) will complete the SDA. Interviews were audio recorded and externally transcribed by official transcription services. The secondary data analyst (ST) will complete thematic SDA using clean pre-transcribed interview transcripts and anonymised participant demographic data in the context of subtle realism. As guided by the National Institute for Health and Care Research (63), data will be rigorously handled and stored. All data and information is protected and stored by the research electronic data capture (REDCap) software (64).

### **Data collection instruments and technologies**

The topic guide (Supplementary File 2) allowed for purposeful exploration of the phenomena of interest whilst simultaneously allowing comprehensive and systematic exploration of participant responses (65). The topic guide was created by the primary data collector (SA) alongside academics with expertise in the field (NH, AR, DF, AG, AS) and the secondary data analyst (ST) to ensure that interview data was relevant and targeted to both the parent study and the SDA.

As per recommendations semi-structured interview questions were designed with open-ended, clear, and neutral language (51). The interview started with simple contextual questions before moving into more in-depth questions to understand participant experience and their perception of the world (51). Questions on the main theme and follow-up questions are used throughout exploring participants thoughts, feelings, and beliefs (51, 54).

The SRS-22r was chosen as a data collection tool to comprise the second half of the interview (66). This outcome measure was chosen due to its internal consistency, reliability and reproducibility (67). Furthermore, the SRS-22r is one of the most commonly used and accepted patient reported outcome measures and has been shown to provide information on HRQOL that is not obtained from other outcome measures such as the Child Health Questionnaire (CHQ-CF87) (66-68). Although the SRS-22r scores do not correlate well with Cobb angle and trunk deformity measurements, it has been shown to be more sensitive towards HRQOL than other outcome measures such as the CHQ-CF87 (67, 68). Further work remains ongoing into content validity testing and a wider application of the SRS-22r (35). Through calculating SRS-22r scores and interviewing participants to obtain verbal accounts that acknowledge biopsychosocial factors we can better understand participation in physical activity, sports, and exercise in AIS.

### **Data items and units of study**

The full interview comprised semi-structured questions surrounding factors influencing participation in sports, exercise, and physical activity. Following this the second half of the interview is comprised of completion and content validity testing of the SRS-22r for the

purposes of the parent study, however qualitative responses were incorporated into the SDA (Supplementary File 2) (66).

### **Data outcomes, processing, and prioritisation**

Following data collection, transcripts will be analysed for trends in qualitative factors surrounding participation in sports, exercise and physical activity. Throughout the process information on participant demographics and attrition rate will be recorded to allow for internal and external validity, reduce bias, and improve generalisability (69). Due to the nature of patient confidentiality in the National Health Service and individual qualitative interviews we are able to expose unexpected spillover (70, 71). This study was completed in a single setting and therefore it is important to be aware that lack of replication in other settings may influence robustness (71).

The secondary data analyst (ST) will ensure audit trails, critical reflective comparison, ethical practice and rigor is maintained and therefore making it an appropriate form of evaluating factors influencing participation (72).

### **Data analysis and synthesis**

A six stage Braun and Clarke reflexive thematic analysis (73) will be used to establish trustworthiness (73, 74). This is the same six stage process that was used during thematic analysis of the parent study (35). Firstly, phase one involves data transcriptions which will be thematically analysed for familiarity (73). Phase two involves coding through labelling participant quotes for similarities and differences (73-75). During phase three, data will be searched for themes and grouped together under corresponding codes with all quotations

under that code being listed for analysis and review (73-75). Themes identified will be searched for during phase three and then reviewed during phase four (73, 74). This allows for searching across all quotations by certain words or phrases as well as visualising the data on a certain theme (75). During phase four, data will be thematically synthesised using direct quotations to produce descriptive themes (76). Any subthemes identified in relation to demographic data will also be recoded for analysis and synthesis. Phase five involves naming the themes with both themes and narratives will be described in depth to reflect the broad range of experiences discussed in the data and promote transferability (51, 73, 74). This process will involve an in-depth description of multiple participant perspectives and narratives with a traditional integration of quotes into the results text (51). Finally phase six of data synthesis is producing the report, data analysis and synthesis is complete themes, subthemes and participant quotes will be represented in a table to allow for easy visualisation and interpretation of results (73, 74).

### **Techniques to enhance trustworthiness, reduce risk of bias, and increase confidence in the evidence**

To ensure credibility, other members of the research team will be involved throughout the process giving congruence between respondents' views and the researchers representation (74). This study will involve peer debriefing throughout to provide an external check on the research process and promote credibility (74). Furthermore, data analysis, systematising and audit process will be documented throughout to help increase rigor (36, 74).

Numerous techniques have been used to help enhance trustworthiness. These include identifying how the nature of secondary data analysis may influence results, increasing rigor and identifying any limitations in qualitative SDA (36). This study endeavours to increase rigor and trustworthiness by involving research team members from the primary data collection with specific expertise (SA, NH, AG, AR, DF) as well as new members with expertise in spinal surgery and research methodology (AS) including the secondary data analyst (ST) with new perspectives uninfluenced by the primary analysis (36). Those completing the SDA will complete it with uncoded transcripts with audit trails and peer debriefing throughout (36). Further identification of limitations in qualitative SDA for example changes in time, societal norms, or context will be identified (36). Beneficially, SDA reduces the researcher's emotional investment in data and thereby helps objectify results (72). The SDA has been planned from early on in the primary study prior to data collection to ensure that goals and purpose of the secondary data analysis are a good fit with the primary study increasing confidence in the evidence (36).

Quality will be promoted throughout this study using researcher triangulation, participant validation, peer review, negative case analysis, and using multiple data coders with standardised methods (74, 77). This study follows a previous systematic review (78) and has a clear research question with continuity between the aims and methodology (76).

Furthermore, the methodology promotes rigor in sampling, data collection, exploration of deviant cases and researcher reflexivity (76). Audit processes and documentation will be used throughout to encourage dependability (74). Due to ethical considerations, resource, and epistemological challenges member checking is not possible in order to ensure participant protection (79). There are no conflicts of interest identified in this protocol and transparency will be promoted throughout (76, 80). This protocol and methodology has been written and



guided by both the COREQ and SRQR checklist, both shown to help improve transparency and ensure explicit, comprehensive reporting (33, 34). The Joanna Briggs Institute Checklist for Qualitative Research (JBICQR) will be used to guide the qualitative research and ensure that results are sensitive and valid (81, 82).

## **Discussion**

Participation in sports, exercise, and physical activity has been shown to have numerous benefits for individuals suffering with AIS including improved quality of life, improved pain, and improved function (5, 17). However, many individuals with AIS do not participate in sports and exercise and there is limited qualitative research examining why (27). There is limited research suggesting possible reasons why asymptomatic healthy children and adults do not participate in sports, such as lack of motivation, skill and feeling self-conscious (83). Comparatively, desire for social interaction and enjoyment helps facilitate participation (83). However, to the best of the authors knowledge, no work has been undertaken to examine qualitative factors influencing participation in sports, exercise, and physical activity specifically within AIS. Furthermore, to determine if there are any trends dependent on demographics such as curve severity or morphology as defined by the Lenke classification, pain intensity, or management strategy (62).

Factors such as pain and curve severity have been shown as limitations to sports, exercise, and physical activity participation in AIS and reduced quality of life (21, 27). However, the majority of the literature remains surrounding exercise participation in AIS remains quantitative with no understanding surrounding individual choice to participate in or abstain from exercise (21, 27, 84). Further robust literature is needed to examine these factors and

better understand how physiotherapists can engage with individuals diagnosed with AIS to help the individual engage with sports, exercise, and physical activity and promote the benefits of exercise in an individualised, achievable, and sustainable manner (85-87).

There is a small body of evidence surrounding safety of when it is appropriate for an individual to return to sports, exercise, or physical activity following corrective surgery in AIS (23, 24, 88). However, there remains very little information regarding rates of participation and uptake of sports, exercise, and physical activity (21, 27). Furthermore, to the best of our knowledge there is no evidence exploring specific individual opinions, beliefs, or attitudes influencing participation in sports, exercise, or physical activity in AIS in either post-operative or conservatively managed individuals.

Due to the benefits of sports, exercise, and physical activity participation in AIS and the lack of understanding surrounding factors influencing participation, this secondary data analysis aims to identify key factors influencing participation and if there is a relationship with curve severity, lenke type, pain intensity, or management type.

### **Ethics and Dissemination**

Full ethical approval was provided for the parent study by the Health Research Authority (IRAS 289888) and Health and Care Research Wales approval (REC reference: 21/WM/0076). Further ethical approval for the SDA of interview transcripts for the purposes of this study was provided by the Health Research Authority and Royal Orthopaedic NHS Foundation Trust ROH21ORTH04. Data collected from studies will be stored in accordance with the UoB data protection policy. Data from included studies and data used for analysis can be accessed when requested from the primary author.

The results from this paper will aim be disseminated through both conference presentations at Physiotherapy UK 2023, EuroSpine 2024, the Physiotherapy Research Society 2024, and targeted journal publications. Possible journals include Spine or PlosOne. Additionally, the results will be used to inform future research and provide training for clinicians undertaking evidence-based practice (89).

## **References:**

1. Yilmaz H, Zateri C, Kusvuran Ozkan A, Kayalar G, Berk H. Prevalence of adolescent idiopathic scoliosis in Turkey: an epidemiological study. *Spine J.* 2020;20(6):947-55.
2. Scoliosis Research Society. Revised Glossary of Terms 2000 [Available from: <https://www.srs.org/professionals/online-education-and-resources/glossary/revised-glossary-of-terms>].
3. Balagué F, Pellisé F. Adolescent idiopathic scoliosis and back pain. *Scoliosis Spinal Disord.* 2016;11(1):27.
4. Hébert JJ. Spinal pain in childhood: prevalence, trajectories, and diagnoses in children 6 to 17 years of age. *European Journal of Pediatrics.* 2022;181(4):1727-37.
5. Zhou Z, Liu F, Li R, Chen X. The effects of exercise therapy on adolescent idiopathic scoliosis: An overview of systematic reviews and meta-analyses. *Complementary Therapies in Medicine.* 2021;58.
6. Çolak TK, Akgül T, Çolak I, Dereli EE, Chodza M, Dikici F. Health related quality of life and perception of deformity in patients with adolescent idiopathic scoliosis. *J Back Musculoskelet Rehabil.* 2017;30(3):597-602.
7. Weinstein SL, Dolan LA, Spratt KF, Peterson KK, Spoonamore MJ, Ponseti IV. Health and function of patients with untreated idiopathic scoliosis: a 50-year natural history study. *Jama.* 2003;289(5):559-67.
8. Caspersen CJ, Powell KE, Christenson GM. Physical activity, exercise, and physical fitness: definitions and distinctions for health-related research. *Public Health Rep.* 1985;100(2):126-31.
9. Khan KM, Thompson AM, Blair SN, Sallis JF, Powell KE, Bull FC, et al. Sport and exercise as contributors to the health of nations. *Lancet.* 2012;380(9836):59-64.
10. Malm C, Jakobsson J, Isaksson A. Physical Activity and Sports-Real Health Benefits: A Review with Insight into the Public Health of Sweden. *Sports (Basel).* 2019;7(5).
11. World Health Organization. Physical activity 2023 [Available from: [https://www.who.int/health-topics/physical-activity#tab=tab\\_1](https://www.who.int/health-topics/physical-activity#tab=tab_1)].

12. World Health Organization. International classification of functioning, disability and health: children and youth version: ICF-CY. World Health Organization; 2007.
13. NHS. Physical activity guidelines for children and young people 2021 [Available from: <https://www.nhs.uk/live-well/exercise/physical-activity-guidelines-children-and-young-people/>].
14. GOV.UK. Physical Activity for Disabled Children and Disabled Young People 2022 [Infographic explaining the physical activity needed for general health benefits for disabled children and disabled young people.]. Available from: [https://assets.publishing.service.gov.uk/government/uploads/system/uploads/attachment\\_data/file/1055018/infographic-physical-activity-for-disabled-children-and-disabled-young-people.pdf](https://assets.publishing.service.gov.uk/government/uploads/system/uploads/attachment_data/file/1055018/infographic-physical-activity-for-disabled-children-and-disabled-young-people.pdf).
15. Zapata KA, Wang-Price SS, Sucato DJ. Six-Month Follow-up of Supervised Spinal Stabilization Exercises for Low Back Pain in Adolescent Idiopathic Scoliosis. *Pediatric Physical Therapy*. 2017;29(1).
16. Fusco C, Zaina F, Atanasio S, Romano M, Negrini A, Negrini S. Physical exercises in the treatment of adolescent idiopathic scoliosis: An updated systematic review. *Physiotherapy Theory and Practice*. 2011;27(1):80-114.
17. Anwer S. Effects of Exercise on Spinal Deformities and Quality of Life in Patients with Adolescent Idiopathic Scoliosis. *BioMed Research International*. 2015;2015:1-16.
18. Romano M, Minozzi S, Zaina F, Saltikov JB, Chockalingam N, Kotwicki T, et al. Exercises for adolescent idiopathic scoliosis: a Cochrane systematic review. *Spine (Phila Pa 1976)*. 2013;38(14):E883-93.
19. Theis JC, Grauers A, Diarbakerli E, Savvides P, Abbott A, Gerdhem P. An observational study on surgically treated adult idiopathic scoliosis patients' quality of life outcomes at 1- and 2-year follow-ups and comparison to controls. *Scoliosis & Spinal Disorders*. 2017;12:1-10.
20. Płaszewski M, Bettany-Saltikov J. Non-surgical interventions for adolescents with idiopathic scoliosis: an overview of systematic reviews. *PLoS One [Internet]*. 2014 PMC4213139; 9(10):[e110254 p.].
21. Parsch D, Gärtner V, Brocai DR, Carstens C, Schmitt H. Sports activity of patients with idiopathic scoliosis at long-term follow-up. *Clin J Sport Med*. 2002;12(2):95-8.

22. Rubery PT, Bradford DS. Athletic Activity After Spine Surgery in Children and Adolescents: Results of a Survey. *Spine*. 2002;27(4).
23. Lehman Jr RA, Kang DG, Lenke LG, Sucato DJ, Bevevino AJ, Spinal Deformity Study Group. Return to sports after surgery to correct adolescent idiopathic scoliosis: a survey of the Spinal Deformity Study Group. *Spine Journal*. 2015;15(5):951-9.
24. Pepke W, Madathinakam A, Bruckner T, Renkawitz T, Hemmer S, Akbar M. Return to Sport after Adolescent Idiopathic Scoliosis (AIS) Correction Surgery: A Retrospective Data Analysis. *Journal of Clinical Medicine*. 2023;12(4):1551.
25. Ekland E, Heian F, Hagen KB. Can exercise improve self esteem in children and young people? A systematic review of randomised controlled trials. *Br J Sports Med*. 2005;39(11):792-8; discussion -8.
26. Diarbakerli E, Grauers A, Möller H, Abbott A, Gerdhem P. Adolescents with and without idiopathic scoliosis have similar self-reported level of physical activity: A cross-sectional study. *Scoliosis Spinal Disord*. 2016;11(1):17-.
27. Youssef M, Soliman J, Burrow S, Kishta W, Simunovic N, Duong A, et al. Does curve magnitude in adolescent idiopathic scoliosis (AIS) affect frequency and quality of sport participation? A feasibility study. *Pilot and Feasibility Studies*. 2021;7(1):26.
28. Thompson JY, Williamson EM, Williams MA, Heine PJ, Lamb SE. Effectiveness of scoliosis-specific exercises for adolescent idiopathic scoliosis compared with other non-surgical interventions: a systematic review and meta-analysis. *Physiotherapy*. 2019;105(2):214-35.
29. Li X, Shen J, Liang J, Zhou X, Yang Y, Wang D, et al. Effect of core-based exercise in people with scoliosis: A systematic review and meta-analysis. *Clinical Rehabilitation*. 2021;35(5):669-80.
30. Choudhry MN, Ahmad Z, Verma R. Adolescent Idiopathic Scoliosis. *The open orthopaedics journal*. 2016;10:143-54.
31. Du C, Yu J, Zhang J, Jiang J, Lai H, Liu W, et al. Relevant areas of functioning in patients with adolescent idiopathic scoliosis on the International Classification of Functioning, Disability and Health: The patients' perspective. *Journal of rehabilitation medicine*. 2016;48(9):806-14.

32. Motyer GS, Fitzgerald A, Kiely PJ. Adolescents' Experiences of Idiopathic Scoliosis in the Presurgical Period: A Qualitative Study. *Journal of pediatric psychology*. 2021.
33. O'Brien BC, Harris IB, Beckman TJ, Reed DA, Cook DA. Standards for Reporting Qualitative Research: A Synthesis of Recommendations. *Academic Medicine*. 2014;89(9).
34. Tong A, Sainsbury P, Craig J. Consolidated criteria for reporting qualitative research (COREQ): a 32-item checklist for interviews and focus groups. *Int J Qual Health Care*. 2007;19(6):349-57.
35. Alamrani S, Gardner A, Falla D, Russell E, Rushton AB, Heneghan NR. Content validity of Scoliosis Research Society questionnaire-22 revised (SRS-22r) for adolescents with idiopathic scoliosis: protocol for a qualitative study exploring patient's and practitioner's perspectives. *BMJ Open*. 2021;11(12).
36. Ruggiano N, Perry TE. Conducting secondary analysis of qualitative data: Should we, can we, and how? *Qualitative Social Work*. 2017;18(1):81-97.
37. Seale C. *Qualitative research practice / edited by Clive Seale ... [and others]*: London Thousand Oaks, Calif. : SAGE, 2007; 2007.
38. Mays N, Pope C. Qualitative Research in Health Care: Assessing Quality in Qualitative Research. *BMJ*. 2000;320(7226):50-2.
39. Duncan EAS, Nicol MM. Subtle Realism and Occupational Therapy: an Alternative Approach to Knowledge Generation and Evaluation. *The British journal of occupational therapy*. 2004;67(10):453-6.
40. Murphy E. Qualitative research methods in health technology assessment: a review of the literature. *Health Technology Assessment*. 1998;2(1):1-277.
41. Seale C. *The quality of qualitative research*. London: London : SAGE; 1999.
42. McManus Holroyd AE. Interpretive Hermeneutic Phenomenology: Clarifying Understanding. *Indo-Pacific Journal of Phenomenology*. 2007;7(2):1-12.
43. Mays N. Qualitative research in health care: assessing quality in qualitative research...first in a series of three articles. *BMJ: British Medical Journal (International Edition)*. 2000;320(7226):50-3.

44. Malterud K. Qualitative research: standards, challenges, and guidelines. *The Lancet*. 2001;358(9280):483-8.
45. Pannucci CJ, Wilkins EG. Identifying and avoiding bias in research. *Plast Reconstr Surg*. 2010;126(2):619-25.
46. Mauthner NS, Parry O, Backett-Milburn K. The Data are Out there, or are They? Implications for Archiving and Revisiting Qualitative Data. *Sociology*. 1998;32(4):733-45.
47. Staniszewska S, Brett J, Simera I, Seers K, Mockford C, Goodlad S, et al. GRIPP2 reporting checklists: tools to improve reporting of patient and public involvement in research. *Research Involvement and Engagement*. 2017;3(1):13.
48. HCPC. Providing care and treatment remotely. What to consider when your scope of practice moves online. 2021 [Available from: <https://www.hcpc-uk.org/standards/meeting-our-standards/scope-of-practice/providing-care-and-treatment-remotely/>].
49. The Chartered Society of Physiotherapy. Maintaining safe services: supporting you to make safe decisions about patient contact 2021 [Available from: <https://www.csp.org.uk/news/coronavirus/maintaining-safer-services>].
50. Majid MAA, Othman M, Mohamad SF, Lim SAH, Yusof A. Piloting for interviews in qualitative research: Operationalization and lessons learnt. *International Journal of Academic Research in Business and Social Sciences*. 2017;7(4):1073-80.
51. DeJonckheere M, Vaughn LM. Semistructured interviewing in primary care research: a balance of relationship and rigour. *Family Medicine and Community Health*. 2019;7(2):e000057.
52. Whiting LS. Semi-structured interviews: guidance for novice researchers. *Nursing Standard (through 2013)*. 2008;22(23):35-40.
53. Turner lii DW. Qualitative interview design: A practical guide for novice investigators. *Qualitative report*. 2010;15(3):754-60.
54. Kallio H, Pietilä A-M, Johnson M, Kangasniemi M. Systematic methodological review: developing a framework for a qualitative semi-structured interview guide. 2016.
55. Leung L. Validity, reliability, and generalizability in qualitative research. *J Family Med Prim Care*. 2015;4(3):324-7.



56. Draper AK. The principles and application of qualitative research. Proceedings of the nutrition society. 2004;63(4):641-6.
57. Swift JA, Tischler V. Qualitative research in nutrition and dietetics: getting started. J Hum Nutr Diet. 2010;23(6):559-66.
58. Malterud K, Siersma VD, Guassora AD. Sample Size in Qualitative Interview Studies: Guided by Information Power. Qual Health Res. 2016;26(13):1753-60.
59. Tobin GA, Begley CM. Methodological rigour within a qualitative framework. J Adv Nurs. 2004;48(4):388-96.
60. Horng M-H, Kuok C-P, Fu M-J, Lin C-J, Sun Y-N. Cobb Angle Measurement of Spine from X-Ray Images Using Convolutional Neural Network. Computational and Mathematical Methods in Medicine. 2019;2019:6357171.
61. Corti L, Day A, Backhouse G. Confidentiality and Informed Consent: Issues for Consideration in the Preservation of and Provision of Access to Qualitative Data Archives. Forum, qualitative social research. 2000;1(3).
62. Lenke LG, Betz RR, Harms J, Bridwell KH, Clements DH, Lowe TG, et al. Adolescent idiopathic scoliosis: a new classification to determine extent of spinal arthrodesis. J Bone Joint Surg Am. 2001;83(8):1169-81.
63. NIHR Open Research. Data Guidelines 2019 [Available from: <https://openresearch.nihr.ac.uk/for-authors/data-guidelines>].
64. Research Electronic Data Capture. REDcap 2004 [Available from: <https://www.project-redcap.org>].
65. Jamshed S. Qualitative research method-interviewing and observation. J Basic Clin Pharm. 2014;5(4):87-8.
66. Scoliosis Research Society. Patient Outcome Questionnaires 2006 [SRS-22r]. Available from: <https://www.srs.org/professionals/online-education-and-resources/patient-outcome-questionnaires>.
67. Glattes RC, Burton DC, Lai SM, Frasier E, Asher MA. The Reliability and Concurrent Validity of the Scoliosis Research Society-22r Patient Questionnaire Compared With the

Child Health Questionnaire-CF87 Patient Questionnaire for Adolescent Spinal Deformity. *Spine*. 2007;32(16).

68. Gardner A, Cole A, Harding I. What does the SRS-22 outcome measure tell us about spinal deformity surgery for Adolescent Idiopathic Scoliosis in the UK? *Ann R Coll Surg Engl*. 2021;103(7):530-5.

69. Page SJ, Persch AC. Recruitment, retention, and blinding in clinical trials. *Am J Occup Ther*. 2013;67(2):154-61.

70. Galizzi MM, Whitmarsh L. How to Measure Behavioral Spillovers: A Methodological Review and Checklist. *Front Psychol*. 2019;10:342.

71. Ditlmann R, Paluck EL. *Field Experiments*. Second Edition ed: Elsevier Ltd; 2015. p. 128-34.

72. Ruggiano N, Perry TE. Conducting secondary analysis of qualitative data: Should we, can we, and how? *Qual Soc Work*. 2019;18(1):81-97.

73. Braun V, Clarke V. Using thematic analysis in psychology. *Qualitative Research in Psychology*. 2006;3(2):77-101.

74. Nowell LS, Norris JM, White DE, Moules NJ. Thematic Analysis: Striving to Meet the Trustworthiness Criteria. *International journal of qualitative methods*. 2017;16(1):1-13.

75. Adeoye-Olatunde OA, Olenik NL. Research and scholarly methods: Semi-structured interviews. *JAACP : Journal of the American College of Clinical Pharmacy*. 2021;4(10):1358-67.

76. Jane Noyes, Andrew Booth, Margaret Cargo, Kate Flemming, Angela Harden, Janet Harris, et al. *Cochrane Handbook for Systematic Reviews of Interventions 2022*. Available from: <https://training.cochrane.org/handbook/current/chapter-21>.

77. Reynolds J. Quality assurance of qualitative research: a review of the discourse. *Health Research Policy & Systems*. 2011;9(1):43-4.

78. Tucker S, Heneghan NR, Alamrani S, Rushton A, Gardner A, Soundy A. Barriers and facilitators of physical function, activity, sports and exercise in children and adolescents with spinal pain: a protocol for a systematic review and meta-ethnography. *BMJ Open*. 2023;13(3):e063946.

79. Birt L, Scott S, Cavers D, Campbell C, Walter F. Member Checking: A Tool to Enhance Trustworthiness or Merely a Nod to Validation? *Qualitative Health Research*. 2016;26(13):1802-11.
80. Larkin M, Watts S, Clifton E. Giving voice and making sense in interpretative phenomenological analysis. *Qualitative research in psychology*. 2006;3(2):102-20.
81. Hannes K, Lockwood C, Pearson A. A Comparative Analysis of Three Online Appraisal Instruments' Ability to Assess Validity in Qualitative Research. *Qualitative health research*. 2010;20:1736-43.
82. Munn Z, Moola S, Riitano D, Lisy K. The development of a critical appraisal tool for use in systematic reviews addressing questions of prevalence. *Int J Health Policy Manag*. 2014;3(3):123-8.
83. Allender S, Cowburn G, Foster C. Understanding participation in sport and physical activity among children and adults: a review of qualitative studies. *Health Educ Res*. 2006;21(6):826-35.
84. Lau RW, Kwan RL, Cheng JC, Hui SS, Lam TP. Patients with Adolescent Idiopathic Scoliosis Have Higher Metabolic Cost during High-Intensity Interval Training. *Int J Environ Res Public Health*. 2023;20(3).
85. Messing S, Rütten A, Abu-Omar K, Ungerer-Röhrich U, Goodwin L, Burlacu I, et al. How can physical activity be promoted among children and adolescents? A systematic review of reviews across settings. *Frontiers in public health*. 2019:55.
86. Bond B, Weston KL, Williams CA, Barker AR. Perspectives on high-intensity interval exercise for health promotion in children and adolescents. *Open Access Journal of Sports Medicine*. 2017;8:243-65.
87. Kakar RS, Simpson KJ, Das BM, Brown CN. Review of Physical Activity Benefits and Potential Considerations for Individuals with Surgical Fusion of Spine for Scoliosis. *Int J Exerc Sci*. 2017;10(2):166-77.
88. Barile F, Ruffilli A, Manzetti M, Fiore M, Panciera A, Viroli G, et al. Resumption of sport after spinal fusion for adolescent idiopathic scoliosis: a review of the current literature. *Spine Deform*. 2021;9(5):1247-51.

89. Health & Care Professions Council. Standards of proficiency. Physiotherapists 2013  
[Available from: <https://www.hcpc-uk.org/globalassets/resources/standards/standards-of-proficiency---physiotherapists.pdf>]

### **Authors' contributions**

Study conceived by NH, AS, AG, AR, DF, SA, ST, with all authors contributing to shaping the design and methods. ST drafted the manuscript with guidance from AS and NH. All authors contributed to the revising and re-drafting the manuscript. The final version was approved by all authors with agreement to submission to BMJ Open. NH is the guarantor of the work, with ST the corresponding author.

### **Funding Statement:**

The work has received funding from the Birmingham Orthopaedic Charity. Support was given from the University of Birmingham (UoB) School of Sport Exercise and Rehabilitation Sciences.

### **Competing interests statement:**

There were no competing interests of review authors.

## **Supplementary File 1: GRIPP 2 CHECKLIST**

| <b>SECTION AND TOPIC</b> | <b>TITLE</b>                                                                                                                                                                                                                                                                                                                                                                                                                                                                                                                                                   |
|--------------------------|----------------------------------------------------------------------------------------------------------------------------------------------------------------------------------------------------------------------------------------------------------------------------------------------------------------------------------------------------------------------------------------------------------------------------------------------------------------------------------------------------------------------------------------------------------------|
| <b>1: Aim</b>            | <p>The steering group used in this study and in the parent study contributed, reflected, and discussed throughout the research process to improve the relevance and quality of research (47).</p> <p>This study aims to identify factors influencing participation in sports, exercise, and physical activity in children and adolescents under the age of 18 years diagnosed with AIS.</p>                                                                                                                                                                    |
| <b>2: Methods</b>        | <p>PPI will be involved in this study from conceptualisation and will continue to be involved until dissemination. Furthermore, this study has involved those who are not participants in research decisions including clinicians (ST, AG, SA) in the field and academics (NH, AS, AR, DF) regarding research methodology.</p> <p>During the parent study a PPI representative (ER) who was part of the study management group gave feedback on the study protocol, the topic guide as well as the participant information sheets, and consent forms (35).</p> |
| <b>3: Results</b>        | <p>The steering group for this study (AS, NH, AG, AR, DF, SA) will be used as a resource for PPI to discuss all outcomes during results analysis.</p>                                                                                                                                                                                                                                                                                                                                                                                                          |
| <b>4: Discussion</b>     | <p>The influence of PPI on the study results and the positive and negative effects of PPI will be considered at the point of the SDA results discussion.</p>                                                                                                                                                                                                                                                                                                                                                                                                   |
| <b>5: Reflections</b>    | <p>The influence of PPI and the positive and negative aspects of PPI will be considered following the SDA reflection.</p>                                                                                                                                                                                                                                                                                                                                                                                                                                      |

ST; Susanna Tucker, PhD student and Senior Physiotherapist at the Royal Orthopaedic Hospital Birmingham.

AS; Andrew Soundy, Senior tutor and lecturer at the University of Birmingham

SA; Samia Alamrani, PhD student at the University of Birmingham

AG; Adrian Gardner, Professor of Spinal Surgery, Royal Orthopaedic Hospital Birmingham

AR; Alison Rushton, Professor and Director of the School of Physical Therapy, Western University

DF; Deborah Falla, Professor of Physiotherapy at the University of Birmingham

NH; Nicola R Heneghan, Honorary lecturer at the University of Birmingham

## **Supplementary File 2: Topic Guide**

| Research Aim      | Content validity of the Scoliosis research society questionnaire                                                                                                                                                                                                                                                                                                                                                                                                                                                                                                                                                                                                                                                                                                                                                                                                                                                                                                                                                                                                                                                                                                                                                                         |                                                                                   |                                                                                                                                                                                                                        |
|-------------------|------------------------------------------------------------------------------------------------------------------------------------------------------------------------------------------------------------------------------------------------------------------------------------------------------------------------------------------------------------------------------------------------------------------------------------------------------------------------------------------------------------------------------------------------------------------------------------------------------------------------------------------------------------------------------------------------------------------------------------------------------------------------------------------------------------------------------------------------------------------------------------------------------------------------------------------------------------------------------------------------------------------------------------------------------------------------------------------------------------------------------------------------------------------------------------------------------------------------------------------|-----------------------------------------------------------------------------------|------------------------------------------------------------------------------------------------------------------------------------------------------------------------------------------------------------------------|
| Interview Section | Questions/Content                                                                                                                                                                                                                                                                                                                                                                                                                                                                                                                                                                                                                                                                                                                                                                                                                                                                                                                                                                                                                                                                                                                                                                                                                        | Prompts                                                                           | Aims                                                                                                                                                                                                                   |
| Ethics Statement  | <p>Firstly, I would like to thank you for agreeing to take part in this interview. "My name is [Samia]. I am a student in University of Birmingham. I am also a mother and one of my kids is the same age as you. Today, I will be chatting with you about your back.</p> <p>Just a reminder that this interview will be audio/video-recorded, but all information will be kept confidential and anonymised, so you are not identifiable from the questions/answers you give during the recording.</p> <p>If you change your mind at any point, just tell me that you want to stop the interview; it is absolutely fine to do that. This will not affect your current and future health care.</p> <p>You also have the right not to answer a question if you do not wish to. There are no right or wrong answers. I am interested in your own experiences AND thoughts.</p> <p>If I ask you a question and you don't know what I mean, please just say 'I don't get it' or 'I don't know what you mean,' and I'll try to ask it another way.</p> <p>Just to reassure you- none of the answers or information that you give me will be associated with you and your name will be replaced by code number when we report the findings.</p> | <ul style="list-style-type: none"> <li>• <i>Is this okay for you?"</i></li> </ul> | <ul style="list-style-type: none"> <li>• To ensure full understanding of what is expected of the participant during this interview.</li> <li>• Make sure the participant is comfortable and ready to begin.</li> </ul> |

|                                                             |                                                                                                                                                                                                                                                                                                                                                                                                                                                                                                                                      |                                                                                                                                                                                                                                                                                                                                                      |                                                                                                                                                                                                                                                                 |
|-------------------------------------------------------------|--------------------------------------------------------------------------------------------------------------------------------------------------------------------------------------------------------------------------------------------------------------------------------------------------------------------------------------------------------------------------------------------------------------------------------------------------------------------------------------------------------------------------------------|------------------------------------------------------------------------------------------------------------------------------------------------------------------------------------------------------------------------------------------------------------------------------------------------------------------------------------------------------|-----------------------------------------------------------------------------------------------------------------------------------------------------------------------------------------------------------------------------------------------------------------|
|                                                             | <p>Once the information from the interview has been used, the recordings will be deleted.</p> <p>Before we start, is there anything you'd like to ask?</p>                                                                                                                                                                                                                                                                                                                                                                           |                                                                                                                                                                                                                                                                                                                                                      |                                                                                                                                                                                                                                                                 |
| Background of the content validity of SRS-22r questionnaire | <p>As you have seen in the information sheet, the SRS-22r is a questionnaire that assesses quality of life in people with scoliosis. To remind you QOL is measure of health, comfort, and ability to participate or enjoy life events.</p> <p>Today, our interview will be in two parts. In first part we would like to hear how you feel about your back, and how you feel it affects your life.</p> <p>In the second part we will look at the questionnaire to discuss each question and what information is being collected .</p> | <ul style="list-style-type: none"> <li>• <i>Can I confirm that you have read and understand the information sheet and signed the consent/assent form?</i></li> <li>• <i>Do you have any questions?</i></li> <li>• <i>If you are unsure at any point regarding the study, please ask.</i></li> </ul>                                                  | <ul style="list-style-type: none"> <li>• Inform the participant of the background of the study</li> <li>• Ensure the participant knows they can ask questions if they are unsure.</li> </ul>                                                                    |
| Introductory Questions                                      | <ul style="list-style-type: none"> <li>• Can you tell me a bit about yourself?</li> <li>•</li> <li>• What do you like to do for fun or in your spare time?</li> <li>• Do you like to go for a walk, or other activities like exercise?</li> <li>• Do you like exercising?</li> </ul>                                                                                                                                                                                                                                                 | <ul style="list-style-type: none"> <li>• <i>How old are you ? in which year at school you are? Do you have any brothers and sisters? What is your favourite subject?</i></li> <li>• <i>Which type of exercise is your favourite? Basketball, ballet, swimming?</i></li> <li>• <i>What is it that you like / dislike about exercising?</i></li> </ul> | <ul style="list-style-type: none"> <li>• Make participant relax and feel comfortable with talking and opening up.</li> <li>• Build rapport.</li> </ul>                                                                                                          |
| Transition Questions                                        | <ul style="list-style-type: none"> <li>• Talking about your back? Can you tell me how you have been diagnosed ?</li> <li>• What was your thoughts about it ?</li> </ul>                                                                                                                                                                                                                                                                                                                                                              | <ul style="list-style-type: none"> <li>• <i>When did you first became aware of your back condition? How is that?</i></li> <li>• <i>How did you feel ?</i></li> </ul>                                                                                                                                                                                 | <ul style="list-style-type: none"> <li>• Start to guide the interview towards experiences of patient with scoliosis</li> <li>• To get an idea of their thoughts of having scoliosis.</li> <li>• Explore feeling and perceptions of having scoliosis.</li> </ul> |



|                     |                                                                                                                                                                                                                                                                                        |                                                                                                                                                                                                                                                                                                                                                                                                                                                                                                                                                                                                                                                                                                                                                              |                                                                                                                                                                                                                                                                               |
|---------------------|----------------------------------------------------------------------------------------------------------------------------------------------------------------------------------------------------------------------------------------------------------------------------------------|--------------------------------------------------------------------------------------------------------------------------------------------------------------------------------------------------------------------------------------------------------------------------------------------------------------------------------------------------------------------------------------------------------------------------------------------------------------------------------------------------------------------------------------------------------------------------------------------------------------------------------------------------------------------------------------------------------------------------------------------------------------|-------------------------------------------------------------------------------------------------------------------------------------------------------------------------------------------------------------------------------------------------------------------------------|
| concept elicitation | <ul style="list-style-type: none"> <li>Thinking about your back, do you or have you ever had any difficulties?</li> <li>Do you ever take any painkillers or medicine for your back?</li> </ul>                                                                                         | <ul style="list-style-type: none"> <li><i>Are there any further issues that you can think of?</i></li> <li><i>(For example, your body is hurting you; pain at your joints; You feel pain during or after doing exercise/PE; chest pain; difficult breathing, decrease in the range of your movement? How is that?</i></li> <li><i>Can you think of other parts of your body that are affected because of your back? How do you feel it is affected? why?</i></li> <li><i>How many times do you take pain medications? Is it effective?</i></li> <li><i>What do you do to ease pain other than taking medications?</i></li> <li><i>If we want to measure the pain that you usually have. How much would you give it, in a scale from 0 to 10 ?</i></li> </ul> | <ul style="list-style-type: none"> <li>To explore effects of scoliosis on participant's body functions.</li> <li>To explore the effect of scoliosis on body structures.</li> </ul>                                                                                            |
|                     | <ul style="list-style-type: none"> <li>Can you tell a bit more about any difficulties you have with your back? Which aspects of your daily life does it affect?</li> <li>Can you explain for me if and how your back affects you at school and activities linked to school?</li> </ul> | <ul style="list-style-type: none"> <li><i>Walking to school/catching the bus, climbing stairs, carrying bag.</i></li> <li><i>Sitting, standing, bending, kneeling.</i></li> <li><i>Studying/doing your homework, working in lab/art/music class.</i></li> <li><i>Do you participate in PE/school sports? How do you feel about doing exercise or sports with your classmates?</i></li> <li><i>Have you ever had days off school due to your back issue? Why?</i></li> </ul>                                                                                                                                                                                                                                                                                  | <ul style="list-style-type: none"> <li>To explore the effect of scoliosis on activities and participation (daily life activities). <ul style="list-style-type: none"> <li>Mobility</li> <li>General task demand</li> <li>Major life areas</li> </ul> </li> </ul>              |
|                     | <ul style="list-style-type: none"> <li>Does your back affect your ability to do activities with family or friends?</li> </ul>                                                                                                                                                          | <ul style="list-style-type: none"> <li><i>How is it affect your visiting relatives ? or friends?</i></li> <li><i>Does it affect your ability to go out with family? or friends?</i></li> <li><i>Does your back affect your ability to do things around home? For example : playing sport, Joining a game ?</i></li> </ul>                                                                                                                                                                                                                                                                                                                                                                                                                                    | <ul style="list-style-type: none"> <li>To explore the effect of scoliosis on activities and participation (social life). <ul style="list-style-type: none"> <li>Interpersonal interactions and relationships</li> <li>Community, social and civic life</li> </ul> </li> </ul> |

|  |                                                                                                                                                                                                                   |                                                                                                                                                                                                                                                                                                                                                                                                                                                                                                                                    |                                                                                                                                                                                                                                                                       |
|--|-------------------------------------------------------------------------------------------------------------------------------------------------------------------------------------------------------------------|------------------------------------------------------------------------------------------------------------------------------------------------------------------------------------------------------------------------------------------------------------------------------------------------------------------------------------------------------------------------------------------------------------------------------------------------------------------------------------------------------------------------------------|-----------------------------------------------------------------------------------------------------------------------------------------------------------------------------------------------------------------------------------------------------------------------|
|  | <ul style="list-style-type: none"> <li>Does your curve/back affect your ability to do things at home at all?</li> </ul>                                                                                           | <ul style="list-style-type: none"> <li><i>How your back affect you when taking care of yourself e.g., eating, bathing, toileting, dressing?</i></li> <li><i>Tidying up your room, helping family in preparing meals.</i></li> <li><i>Assisting others</i></li> <li><i>Taking care of pets/plants.</i></li> </ul>                                                                                                                                                                                                                   | <ul style="list-style-type: none"> <li>To explore effect of scoliosis on activities and participation             <ul style="list-style-type: none"> <li>Self-care.</li> <li>Domestic life</li> </ul> </li> </ul>                                                     |
|  | <ul style="list-style-type: none"> <li>Can you describe your feelings when you have an issue with your back, how does this make you feel?</li> </ul>                                                              | <ul style="list-style-type: none"> <li><i>Does it worry you at all?</i></li> <li><i>Do you know what it is specifically that worries you? ( Fear of pain, difficulty performing your homework, your scores in school less than usual, limited in activities that you can do).</i></li> <li><i>Does this affect your energy, (you feel tired)?</i></li> <li><i>Does your back condition ever make you feel down or discouraged, afraid, angry, or anxious ?</i></li> <li><i>Does is it affect your ability to sleep?</i></li> </ul> | <ul style="list-style-type: none"> <li>To explore the effect of scoliosis on mental function             <ul style="list-style-type: none"> <li>Emotional function</li> <li>Energy level</li> <li>Sleep function</li> <li>Personality function</li> </ul> </li> </ul> |
|  | <ul style="list-style-type: none"> <li>How do you feel about the shape of your back?</li> </ul>                                                                                                                   | <ul style="list-style-type: none"> <li><i>Do you think your back shape is affecting your life? How is that ?</i></li> <li><i>Do you think it is limiting your ability to do things? How ?</i></li> <li><i>Do you think about your back when getting ready for sports / changing into uniform or sports kit at school / away from home or with others?</i></li> <li><i>Do you think it is affecting your relationship with other?</i></li> </ul>                                                                                    | <ul style="list-style-type: none"> <li>To explore the effect of scoliosis on mental function (body image)?</li> <li>Explore participants perception on their back shape.</li> </ul>                                                                                   |
|  | <ul style="list-style-type: none"> <li>Can you tell me what management/treatment that you have received for your back?</li> </ul> <p>Can you describe the help that you received during treatment/management?</p> | <ul style="list-style-type: none"> <li><i>What was the treatment you received for your back?</i></li> <li><i>How do you think/feel about it ?</i></li> <li><i>Do you have an idea about other options of treatments you might receive for your back ? what is it ?</i></li> <li><i>How do you feel if you have the same treatment again?</i></li> <li><i>Which type of help/support have you received ? from whom? (Support from family, friends, peers, health professionals ( doctors,</i></li> </ul>                            | <ul style="list-style-type: none"> <li>To explore the experience of participants with their management and their satisfaction.</li> <li>To explore the effect of environmental factors on scoliosis</li> </ul>                                                        |

|                      |                                                                                                                                                                                                                                                                                                        |                                                                                                                                                                                                                                                                                                                                                                                                                                                                                           |                                                                                                                                                                                                                                                                   |
|----------------------|--------------------------------------------------------------------------------------------------------------------------------------------------------------------------------------------------------------------------------------------------------------------------------------------------------|-------------------------------------------------------------------------------------------------------------------------------------------------------------------------------------------------------------------------------------------------------------------------------------------------------------------------------------------------------------------------------------------------------------------------------------------------------------------------------------------|-------------------------------------------------------------------------------------------------------------------------------------------------------------------------------------------------------------------------------------------------------------------|
|                      |                                                                                                                                                                                                                                                                                                        | <p>nurses, physiotherapists, other healthcare providers?</p> <ul style="list-style-type: none"> <li>• What do you think about it?</li> <li>• Have you ever seen a physiotherapist or other therapist (e.g., osteopath/chiropractor)? What did you do with them? Did it help?</li> <li>• Did you feel able to continue being active after seeing the physiotherapist?</li> <li>• Is there anything you feel would improve your experience of living with scoliosis? what is it?</li> </ul> |                                                                                                                                                                                                                                                                   |
|                      | <ul style="list-style-type: none"> <li>• Now, we have reached the end of first part of this interview</li> </ul>                                                                                                                                                                                       | <ul style="list-style-type: none"> <li>• Do you need a break?</li> </ul>                                                                                                                                                                                                                                                                                                                                                                                                                  |                                                                                                                                                                                                                                                                   |
| Cognitive debriefing | <ul style="list-style-type: none"> <li>• For the second part of our discussion, I want to see if the SRS-22r questionnaire is suitable for young people like you</li> <li>• I will read the question one by one to you. Then please tell me, what do you understand the question is asking?</li> </ul> | <ul style="list-style-type: none"> <li>• Have you completed this questionnaire before?</li> </ul>                                                                                                                                                                                                                                                                                                                                                                                         | <ul style="list-style-type: none"> <li>• To test the relevance of SRS-22r items to individuals with AIS</li> <li>• To assess if the SRS-22r items are understandable by individuals with AIS.</li> <li>• To assess if the is SRS-22r is comprehensive.</li> </ul> |
|                      | <p>1. Which one of the following best describes the amount of pain you have experienced during the past 6 months?<br/>-Response options are: None, Mild, Moderate, Moderate to severe, Severe.</p>                                                                                                     | <ul style="list-style-type: none"> <li>• Can you tell me in your words, what this question is asking you about?</li> <li>• Do you think this question is Important to you ? why?</li> <li>• Is there any word that is not clear to you ? what is it?</li> <li>• Can you understand the answers? Is there any word that is not clear to you? what is it?</li> </ul>                                                                                                                        |                                                                                                                                                                                                                                                                   |
|                      | <p>2. Which one of the following best describes the amount of pain you have experienced over the last month?<br/>-Response options are: None, Mild, Moderate, Moderate to severe, Severe</p>                                                                                                           | <ul style="list-style-type: none"> <li>• Can you tell me in your words, what this question is asking you about?</li> <li>• Do you think this question is Important to you ? why?</li> <li>• Is there any word that is not clear to you ? what is it?</li> <li>• Can you understand the answers? Easy to choose the answer?</li> </ul>                                                                                                                                                     |                                                                                                                                                                                                                                                                   |

|  |                                                                                                                                                                                                                                              |                                                                                                                                                                                                                                                                                                                                                                                      |  |
|--|----------------------------------------------------------------------------------------------------------------------------------------------------------------------------------------------------------------------------------------------|--------------------------------------------------------------------------------------------------------------------------------------------------------------------------------------------------------------------------------------------------------------------------------------------------------------------------------------------------------------------------------------|--|
|  | <p>3. During the past 6 months have you been a very nervous person? -<br/>Response options are: None of the time, A little of the time, Some of the time, Most of the time, All of the time.</p>                                             | <ul style="list-style-type: none"> <li>• <i>Do you think this question is relevant to you? or Important to you ? why?</i></li> <li>• <i>Is there any word that is not clear to you ? what is it?</i></li> <li>• <i>Was it easy or difficult to choose that particular answer? Why?</i></li> </ul>                                                                                    |  |
|  | <p>4. If you had to spend the rest of your life with your back shape as it is right now, how would you feel about it? -<br/>Response options are : Very happy, Somewhat happy, Neither happy nor unhappy, Somewhat unhappy, Very unhappy</p> | <ul style="list-style-type: none"> <li>• <i>What do you think the question is asking you about?</i></li> <li>• <i>Is it Important to you ?why?</i></li> <li>• <i>Was it easy or difficult to choose your answer? Why?</i></li> <li>• <i>Do you find this question too personal/ or embarrassing? Why?</i></li> </ul>                                                                 |  |
|  | <p>5. What is your current level of activity? Response options are : Bedridden, Primarily no activity, Light labour and light sports, Moderate labour and moderate sports, Full activities without restriction.</p>                          | <ul style="list-style-type: none"> <li>• <i>Do you understand the question? is it important to you?</i></li> <li>• <i>Are there any words that are not clear to you? What is your thought about these words "labour", "Bedridden", "restrictions"?</i></li> <li>• <i>Was it easy or difficult to choose your answer? Why?</i></li> </ul>                                             |  |
|  | <p>6. How do you look in clothes? -<br/>Response options are : Very good, Good, Fair, Bad, Very bad</p>                                                                                                                                      | <ul style="list-style-type: none"> <li>• <i>Do you understand the question? is it important to you?</i></li> <li>• <i>Was it easy or difficult to choose your answer? Why?</i></li> </ul>                                                                                                                                                                                            |  |
|  | <p>7. In the past 6 months have you felt so down in the dumps that nothing could cheer you up? -<br/>-Response options are :Very often, Often, Sometimes Rarely, Never</p>                                                                   | <ul style="list-style-type: none"> <li>• <i>Do you think this question is relevant to you?</i></li> <li>• <i>Are there any words that are not clear to you? Do you understand word "dump" ? What does it mean?</i></li> <li>• <i>Do you find this question too personal/ or embarrassing? Why?</i></li> <li>• <i>Was it easy or difficult to choose your answer? Why?</i></li> </ul> |  |
|  | <p>8. Do you experience back pain when at rest? -<br/>Response options are : Very often, Often, Sometimes, Rarely, Never</p>                                                                                                                 | <ul style="list-style-type: none"> <li>• <i>Do you think this question is important to you?</i></li> <li>• <i>Was it easy or difficult to choose your answer? Why?</i></li> </ul>                                                                                                                                                                                                    |  |

|  |                                                                                                                                                                                                                                                                                                         |                                                                                                                                                                                                                                                                                                                                                                    |  |
|--|---------------------------------------------------------------------------------------------------------------------------------------------------------------------------------------------------------------------------------------------------------------------------------------------------------|--------------------------------------------------------------------------------------------------------------------------------------------------------------------------------------------------------------------------------------------------------------------------------------------------------------------------------------------------------------------|--|
|  | <p>9. What is your current level of work/school activity? -<br/>Response options are : 100% normal, 75%normal 50% normal, 25% normal, 0% normal</p>                                                                                                                                                     | <ul style="list-style-type: none"> <li>• <i>What went on in your mind when you were asked the question?</i></li> <li>• <i>is there any word that you don't understand?</i></li> <li>• <i>What is your answer? Would you explain to me how you come out with that answer ?</i></li> </ul>                                                                           |  |
|  | <p>10. Which of the following best describes the appearance of your trunk; defined as the human body except for the head and extremities?<br/>-Response options are : Very good, Good, Fair, Poor, Very Poor</p>                                                                                        | <ul style="list-style-type: none"> <li>• <i>What do you think the question is asking you about?</i></li> <li>• <i>Is there any word that you don't understand?</i></li> <li>• <i>Was it easy or difficult to choose your answer? Why?</i></li> </ul>                                                                                                               |  |
|  | <p>11. Which one of the following best describes your pain medication use for back pain?<br/>-Response options are : None, Non-narcotics, weekly or less (e.g., aspirin, Tylenol, Ibuprofen) , Non-narcotics daily, Narcotics weekly or less (e.g. Tylenol III, Lorcet, Percocet), Narcotics daily.</p> | <ul style="list-style-type: none"> <li>• <i>What went on in your mind when you read the question?</i></li> <li>• <i>Is there any word that is not clear to you ? what is it?</i></li> <li>• <i>What does the word " Non-narcotics" means to you?</i></li> <li>• <i>What is your answer? Would you explain to me how you came out with that answer ?</i></li> </ul> |  |
|  | <p>12. Does your back limit your ability to do things around the house? -<br/>Response options are: Never, Rarely, Sometimes Often, Very Often</p>                                                                                                                                                      | <ul style="list-style-type: none"> <li>• <i>What do you think about this question? Is it important to you ?</i></li> <li>• <i>What about the answers? Was it easy or difficult to choose your answer? Why?</i></li> </ul>                                                                                                                                          |  |
|  | <p>13. Have you felt calm and peaceful during the past 6 months?<br/>-Response options are: All of the time, Most of the time, Some of the time, A little of the time, None of the time.</p>                                                                                                            | <ul style="list-style-type: none"> <li>• <i>What do you think the question is asking you about?</i></li> <li>• <i>Is there any word that is not clear to you ? what is it?</i></li> <li>• <i>Was it easy or difficult to choose your answer? Why?</i></li> </ul>                                                                                                   |  |
|  | <p>14. Do you feel that your back condition affects your personal relationships? -<br/>Response options are: None, Slightly, Mildly, Moderately, Severely</p>                                                                                                                                           | <ul style="list-style-type: none"> <li>• <i>Do you think this question is important to you?</i></li> <li>• <i>Is there any word that you do not understand?</i></li> <li>• <i>Was it easy or difficult to choose your answer? Why?</i></li> </ul>                                                                                                                  |  |
|  | <p>15. Are you and/or your family experiencing financial difficulties because of your back?</p>                                                                                                                                                                                                         | <ul style="list-style-type: none"> <li>• <i>What went on in your mind when you read the question?</i></li> </ul>                                                                                                                                                                                                                                                   |  |

|                                                                                                                                                                                                               |                                                                                                                                                                                                                                                                                                                                                                          |  |
|---------------------------------------------------------------------------------------------------------------------------------------------------------------------------------------------------------------|--------------------------------------------------------------------------------------------------------------------------------------------------------------------------------------------------------------------------------------------------------------------------------------------------------------------------------------------------------------------------|--|
| <p>-Response options are:<br/>Severely, Moderately, Mildly Slightly, None.</p>                                                                                                                                | <ul style="list-style-type: none"> <li>• <i>Do you find this question too personal/ or embarrassing? Why?</i></li> <li>• <i>Was it easy or difficult to choose your answer? Why?</i></li> </ul>                                                                                                                                                                          |  |
| <p>16. In the past 6 months have you felt down hearted and blue?<br/>-Response options are: Never Rarely, Sometimes, Often, Very often.</p>                                                                   | <ul style="list-style-type: none"> <li>• <i>What do you think the question is asking you about?</i></li> <li>• <i>Is there any word that you do not understand? what about "down hearted", "blue"?</i></li> <li>• <i>Do you find this question too personal/ or embarrassing? Why?</i></li> <li>• <i>Was it easy or difficult to choose your answer? Why?</i></li> </ul> |  |
| <p>17. In the last 3 months have you taken any days off of work, including household work, or school because of back pain?<br/>-Response options are : 0 days 1 day,2 days,3 days, 4 or more days.</p>        | <ul style="list-style-type: none"> <li>• <i>Is this question important/relevant to you?</i></li> <li>• <i>What is your answer? Was it easy or difficult to choose your answer?</i></li> </ul>                                                                                                                                                                            |  |
| <p>18. Does your back condition limit your going out with friends/family?<br/>-Response options are : Never, Rarely, Sometimes, Often, Very often</p>                                                         | <ul style="list-style-type: none"> <li>• <i>Is this question important/relevant to you?</i></li> <li>• <i>What is your answer? Was it easy or difficult to choose your answer?</i></li> </ul>                                                                                                                                                                            |  |
| <p>19. Do you feel attractive with your current back condition?<br/>-Response options are :<br/>Yes, very<br/>Yes, somewhat, Neither attractive nor unattractive<br/>No, not very much<br/>No, not at all</p> | <ul style="list-style-type: none"> <li>• <i>Is this question important/relevant to you?</i></li> <li>• <i>Is there any word that you do not understand?</i></li> <li>• <i>Do you find this question too personal/ or embarrassing? Why?</i></li> <li>• <i>What is your answer? Was it easy or difficult to choose your answer?</i></li> </ul>                            |  |
| <p>20. Have you been a happy person during the past 6 months?<br/>-Response options are :<br/>None of the time, A little of the time, Some of the time, Most of the time, All of the time</p>                 | <ul style="list-style-type: none"> <li>• <i>Is this question important/relevant to you?</i></li> <li>• <i>Do you find this question too personal/ or embarrassing? Why?</i></li> <li>• <i>What is your answer? Was it easy or difficult to choose your answer?</i></li> </ul>                                                                                            |  |
| <p>21. Are you satisfied with the results of your back management?</p>                                                                                                                                        | <ul style="list-style-type: none"> <li>• <i>What do you think the question is asking you about?</i></li> </ul>                                                                                                                                                                                                                                                           |  |

|            |                                                                                                                                                                                                 |                                                                                                                                                                                                                                                                |                                                                                                                         |
|------------|-------------------------------------------------------------------------------------------------------------------------------------------------------------------------------------------------|----------------------------------------------------------------------------------------------------------------------------------------------------------------------------------------------------------------------------------------------------------------|-------------------------------------------------------------------------------------------------------------------------|
|            | <p>-Response options are :<br/>Very satisfied, Satisfied<br/>Neither satisfied nor<br/>unsatisfied, Unsatisfied, Very<br/>unsatisfied</p>                                                       | <ul style="list-style-type: none"> <li>• <i>Is this question important/relevant to you?</i></li> <li>• <i>Are there any words that you don't understand?</i></li> <li>• <i>What is your answer? Was it easy or difficult to choose your answer?</i></li> </ul> |                                                                                                                         |
|            | <p>22. Would you have the same management again if you had the same condition?<br/>-Response options are :<br/>Definitely yes, Probably yes,<br/>Not sure, Probably not,<br/>Definitely not</p> | <ul style="list-style-type: none"> <li>• <i>Do you think this question is important to you?</i></li> <li>• <i>What is your answer? Was it easy or difficult to choose your answer?</i></li> </ul>                                                              |                                                                                                                         |
|            | <ul style="list-style-type: none"> <li>• Do you think the questionnaire covers all areas which are important to you ?</li> </ul>                                                                | <ul style="list-style-type: none"> <li>• <i>Can you think of other areas that should be included in the questionnaire?</i></li> </ul>                                                                                                                          | <ul style="list-style-type: none"> <li>• To assess if there are any additional areas need to be covered.</li> </ul>     |
| Conclusion | <ul style="list-style-type: none"> <li>• That's all the questions, is there anything else you would like to tell me about your back or the questionnaire.</li> <li>•</li> </ul>                 | <ul style="list-style-type: none"> <li>•</li> <li>• <i>Is there anything you would like to ask regarding the analysis of the data or the next steps of the process?</i></li> </ul>                                                                             | <ul style="list-style-type: none"> <li>• Ensure the participant is comfortable with what has been discussed.</li> </ul> |
|            | <ul style="list-style-type: none"> <li>• Thank you for participating in this study, I really appreciate your time and input.</li> </ul>                                                         |                                                                                                                                                                                                                                                                |                                                                                                                         |
